# Supplementary material for: Mitochondrial impairment and oxidative stress mediated apoptosis induced by α-Fe2O3nanoparticles in Saccharomyces cerevisiae
Source: Royal Society of Chemistry journal article supplement (doi:10.1039/c7tx00123a), 2017-01-01
Supplement: c7tx00123a1.pdf [file c7tx00123a1.pdf]

1 **SUPPLEMENTARY MATERIAL**

2 **Mitochondrial impairment and oxidative stress mediated apoptosis**  
3 **induced by  $\alpha$ -Fe<sub>2</sub>O<sub>3</sub> nanoparticles in *Saccharomyces cerevisiae***

4

5 Song Zhu, Fei Luo, Bin Zhu\*, Gao-Xue Wang\*

6

7 College of Animal Science and Technology, Northwest A&F University, Yangling

8 712100, China

9

10 \*Corresponding author: Northwest A&F University, Xinong Road 22nd, Yangling,

11 Shaanxi 712100, China. Tel./fax: +86 29 87092102.

12 *E-mail addresses:* zhubin1227@126.com (B. Zhu); wanggaoxue@126.com (G-X.

13 Wang).

14

## 15 mRNA expression assays

16 Briefly, approximately  $1 \times 10^7$  cells were collected using density gradient centrifugation  
17 after exposure for 24 h. Total RNA was extracted using Trizol Reagent (Invitrogen,  
18 Carlsbad, CA), and RNA integrity and concentration were measured using a NanoDrop  
19 spectrophotometer (ND-1000, NanoDrop Technologies Inc., Wilmington, DE). SYBR  
20 Premix Ex Taq II kit (Takara, Dalian, China) and CFX96 Real-Time PCR Detection  
21 System (Bio-Rad, Hercules, CA) were used for real-time PCR. Primers for apoptosis-  
22 related genes (SOD, Yca1, Nma111 and Nuc1) and 18S rRNA were designed as  
23 previous studies (Zhu et al., 2016) and listed in Table S2. The 18S rRNA was used as  
24 internal standard, and following cycling conditions were ran: initial denaturation at  
25 95°C for 5 min, 40 cycles of 95°C denaturation for 20 s, 57°C annealing for 20 s and  
26 72°C elongation for 20 s. Melting curves were analyzed for all the reactions. Relative  
27 expression was obtained by using the  $2^{-\Delta\Delta C_t}$  method (Schmittgen and Livak, 2008) and  
28 normalized to the expression of the internal standard gene 18S rRNA in the same  
29 sample.

30

31 **Table S1.** The structural parameters for  $\alpha$ -Fe<sub>2</sub>O<sub>3</sub>-NPs.

| Parameter                   | Unit              | $\alpha$ -Fe <sub>2</sub> O <sub>3</sub> -NPs |
|-----------------------------|-------------------|-----------------------------------------------|
| Particle length (TEM)       | nm                | 63.3 (21.5-116)                               |
| Hydrodynamic diameter (DLS) | $\mu$ m           | 5.2 (0.35-14)                                 |
| Purity                      | wt%               | 99.9                                          |
| Specific surface area       | m <sup>2</sup> /g | 20-60                                         |
| Particle morphology         | -                 | nanorods                                      |

33 **Table S2.** Real time PCR primer pairs used in this study.

| Genes  | Forward primer (5'-3') | Reverse primer (5'-3') | Product size (bp) |
|--------|------------------------|------------------------|-------------------|
| SOD    | CTCGTCCAGACTGCCAAAC    | GCATTACACCAAGCACCAT    | 274               |
| Yca1   | CCAGGATGGAGATGAGGAA    | CAGTGTTGCGGGTGAGGTA    | 284               |
| Nma111 | TGGTCCTGGTCCGTTTCGTAG  | TTTCTGAGCCGACCTTAGCC   | 182               |
| Nuc1   | ATGTTTCGAGGACCCAATAAG  | TATCCACCTACCCAGAAACC   | 174               |
| 18S    | TTCTGCCCTATCAACTTTCG   | GATGTGGTAGCCGTTTCTCA   | 112               |

35 **Table S3.** Contents of Fe<sup>3+</sup> released from  $\alpha$ -Fe<sub>2</sub>O<sub>3</sub>-NPs.

|                                                                 |      |      |      |      |      |      |
|-----------------------------------------------------------------|------|------|------|------|------|------|
| $\alpha$ -Fe <sub>2</sub> O <sub>3</sub> -NPs suspension (mg/L) | 25   | 50   | 100  | 200  | 400  | 600  |
| Fe <sup>3+</sup> content (mg/L)                                 | 1.54 | 2.86 | 3.78 | 4.34 | 4.62 | 4.81 |

36

37 **Table S4.** Twenty-four-hour IC<sub>50</sub> (inhibition of growth by 50%) and LC<sub>50</sub> (lethal  
38 concentration of 50%) calculated for α-Fe<sub>2</sub>O<sub>3</sub>-NPs on *S. cerevisiae*.

| IC <sub>50</sub> (mg/L) | LC <sub>50</sub> (mg/L) |
|-------------------------|-------------------------|
| 352 (266—488)           | 541 (489—608)           |

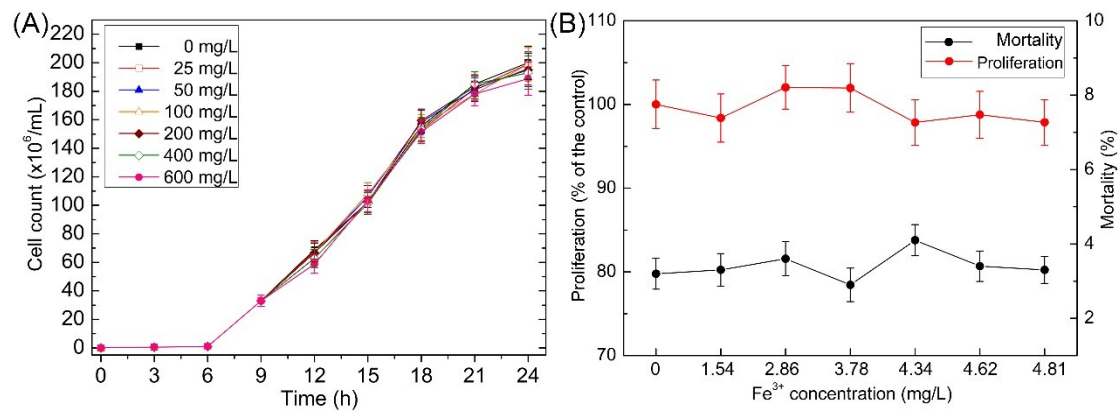

40

41 **Fig. S1.** (A) The growth curves of *S. cerevisiae* exposed to different concentrations of  
 42 iron ion released from  $\alpha$ -Fe<sub>2</sub>O<sub>3</sub>-NPs. (B) Effects of iron ion released from  $\alpha$ -Fe<sub>2</sub>O<sub>3</sub>-NPs  
 43 on cell proliferation and viability after exposure for 24 h. Values are presented as mean  
 44  $\pm$  SD.

45

46 **References**

47 Schmittgen, T.D., Livak, K.J., 2008. Analyzing real-time PCR data by the comparative

48 CT method. *Nature protocols* 3, 1101-1108.

49 Zhu, S., Zhu, B., Huang, A., Hu, Y., Wang, G., Ling, F., 2016. Toxicological effects of

50 multi-walled carbon nanotubes on *Saccharomyces cerevisiae*: The uptake kinetics and

51 mechanisms and the toxic responses. *Journal of Hazardous Materials* 318, 650-662.
